# Supplementary material for: Conformations of d-xylose: the pivotal role of the intramolecular hydrogen-bonding
Source: Royal Society of Chemistry journal article supplement (doi:10.1039/c3cp52345d), 2013-01-01
Supplement: c3cp52345d.pdf [file c3cp52345d.pdf]

## Supporting Information

for

### Conformations of D-Xylose: The pivotal role of the intramolecular hydrogen-bonding

**Table S1.** Observed frequencies and residuals (in MHz) for the rotational transitions of conformer cc  $\alpha$   $^4C_1$  of D-xylose.

| $J'$ | $K'_{-1}$ | $K'_{+1}$ | $J''$ | $K''_{-1}$ | $K''_{+1}$ | $\nu_{\text{obs}}$ | $\nu_{\text{obs}} - \nu_{\text{cal}}$ |
|------|-----------|-----------|-------|------------|------------|--------------------|---------------------------------------|
| 2    | 2         | 1         | 1     | 1          | 1          | 6502.610           | 0.005                                 |
| 3    | 2         | 2         | 2     | 2          | 1          | 6590.751           | 0.005                                 |
| 2    | 2         | 0         | 1     | 1          | 1          | 6739.394           | 0.003                                 |
| 3    | 1         | 2         | 2     | 1          | 1          | 7075.989           | 0.004                                 |
| 2    | 2         | 0         | 1     | 0          | 1          | 7132.376           | 0.005                                 |
| 3    | 2         | 1         | 2     | 2          | 0          | 7295.555           | 0.002                                 |
| 4    | 1         | 3         | 3     | 2          | 1          | 7353.782           | 0.001                                 |
| 4    | 0         | 4         | 3     | 1          | 3          | 7532.298           | 0.007                                 |
| 4    | 1         | 4         | 3     | 1          | 3          | 7543.763           | 0.008                                 |
| 4    | 0         | 4         | 3     | 0          | 3          | 7580.306           | 0.008                                 |
| 4    | 1         | 4         | 3     | 0          | 3          | 7591.774           | 0.011                                 |
| 3    | 2         | 2         | 2     | 1          | 1          | 7769.689           | 0.004                                 |
| 4    | 1         | 3         | 3     | 2          | 2          | 8295.380           | 0.007                                 |
| 4    | 2         | 3         | 3     | 2          | 2          | 8591.209           | 0.003                                 |
| 3    | 1         | 2         | 2     | 0          | 2          | 8635.588           | 0.003                                 |
| 3    | 2         | 1         | 2     | 1          | 1          | 8711.279           | 0.001                                 |
| 4    | 1         | 3         | 3     | 1          | 2          | 8989.075           | 0.001                                 |
| 4    | 3         | 2         | 3     | 3          | 1          | 9101.732           | 0.002                                 |
| 3    | 2         | 2         | 2     | 1          | 2          | 9164.444           | 0.005                                 |
| 4    | 2         | 3         | 3     | 1          | 2          | 9284.905           | -0.001                                |
| 5    | 0         | 5         | 4     | 1          | 4          | 9285.953           | 0.006                                 |
| 5    | 1         | 5         | 4     | 1          | 4          | 9288.413           | 0.004                                 |
| 5    | 0         | 5         | 4     | 0          | 4          | 9297.414           | 0.002                                 |
| 5    | 1         | 5         | 4     | 0          | 4          | 9299.873           | -0.000                                |
| 4    | 3         | 1         | 3     | 3          | 0          | 9516.075           | -0.008                                |
| 3    | 3         | 1         | 2     | 2          | 0          | 9605.429           | 0.005                                 |
| 3    | 3         | 0         | 2     | 2          | 0          | 9693.289           | -0.003                                |
| 4    | 2         | 2         | 3     | 2          | 1          | 9771.780           | -0.006                                |
| 3    | 3         | 1         | 2     | 2          | 1          | 9842.210           | 0.000                                 |
| 3    | 3         | 0         | 2     | 2          | 1          | 9930.074           | -0.004                                |
| 3    | 2         | 1         | 2     | 1          | 2          | 10106.035          | 0.004                                 |
| 3    | 2         | 1         | 2     | 0          | 2          | 10270.878          | -0.000                                |
| 5    | 2         | 4         | 4     | 2          | 3          | 10470.672          | -0.003                                |
| 5    | 1         | 4         | 4     | 1          | 3          | 10671.674          | -0.003                                |
| 5    | 2         | 4         | 4     | 1          | 3          | 10766.485          | -0.022                                |
| 6    | 0         | 6         | 5     | 1          | 5          | 11022.857          | -0.005                                |
| 6    | 1         | 6         | 5     | 1          | 5          | 11023.353          | -0.004                                |
| 6    | 0         | 6         | 5     | 0          | 5          | 11025.321          | -0.002                                |
| 6    | 1         | 6         | 5     | 0          | 5          | 11025.819          | 0.001                                 |
| 3    | 3         | 0         | 2     | 1          | 1          | 11109.013          | -0.003                                |
| 5    | 3         | 3         | 4     | 3          | 2          | 11269.587          | -0.012                                |

**Table S2.** Observed frequencies and residuals (in MHz) for the rotational transitions of conformer c  $\alpha$   $^4C_1$  of D-xylose.

| $J'$ | $K'_{-1}$ | $K'_{+1}$ | $J''$ | $K''_{-1}$ | $K''_{+1}$ | $\nu_{\text{obs}}$ | $\nu_{\text{obs}} - \nu_{\text{cal}}$ |
|------|-----------|-----------|-------|------------|------------|--------------------|---------------------------------------|
| 2    | 2         | 1         | 1     | 1          | 1          | 6515.249           | -0.001                                |
| 3    | 2         | 2         | 2     | 2          | 1          | 6625.561           | 0.005                                 |

|   |   |   |   |   |   |           |        |
|---|---|---|---|---|---|-----------|--------|
| 2 | 2 | 0 | 1 | 1 | 1 | 6756.113  | -0.000 |
| 3 | 1 | 2 | 2 | 1 | 1 | 7110.470  | 0.002  |
| 2 | 2 | 0 | 1 | 0 | 1 | 7143.596  | -0.004 |
| 3 | 2 | 1 | 2 | 2 | 0 | 7339.187  | 0.000  |
| 4 | 0 | 4 | 3 | 0 | 3 | 7615.220  | 0.010  |
| 4 | 2 | 3 | 3 | 2 | 2 | 8633.955  | 0.001  |
| 3 | 2 | 1 | 2 | 1 | 1 | 8742.509  | 0.002  |
| 4 | 1 | 3 | 3 | 1 | 2 | 9026.844  | -0.000 |
| 4 | 3 | 2 | 3 | 3 | 1 | 9152.372  | -0.007 |
| 3 | 2 | 2 | 2 | 1 | 2 | 9191.640  | -0.006 |
| 5 | 1 | 5 | 4 | 1 | 4 | 9332.894  | 0.004  |
| 5 | 0 | 5 | 4 | 0 | 4 | 9341.436  | 0.013  |
| 4 | 3 | 1 | 3 | 3 | 0 | 9577.062  | 0.003  |
| 4 | 2 | 2 | 3 | 2 | 1 | 9824.786  | -0.010 |
| 3 | 2 | 1 | 2 | 0 | 2 | 10306.618 | 0.006  |
| 5 | 2 | 4 | 4 | 2 | 3 | 10520.133 | 0.009  |
| 5 | 1 | 4 | 4 | 1 | 3 | 10715.028 | 0.004  |
| 6 | 1 | 6 | 5 | 1 | 5 | 11076.315 | -0.015 |
| 6 | 0 | 6 | 5 | 0 | 5 | 11078.154 | -0.011 |

**Table S3.** Observed frequencies and residuals (in MHz) for the rotational transitions of  $^{13}\text{C}_1$  monosubstituted isotopologue of conformer cc  $\alpha$   $^4\text{C}_1$  of D-xylose.

| $J'$ | $K'_{-1}$ | $K'_{+1}$ | $J''$ | $K''_{-1}$ | $K''_{+1}$ | $\nu_{\text{obs}}$ | $\nu_{\text{obs}} - \nu_{\text{cal}}$ |
|------|-----------|-----------|-------|------------|------------|--------------------|---------------------------------------|
| 3    | 2         | 2         | 2     | 2          | 1          | 6555.979           | -0.006                                |
| 3    | 1         | 2         | 2     | 1          | 1          | 7040.478           | 0.001                                 |
| 3    | 2         | 1         | 2     | 2          | 0          | 7249.941           | 0.002                                 |
| 4    | 1         | 4         | 3     | 1          | 3          | 7510.780           | 0.001                                 |
| 4    | 0         | 4         | 3     | 0          | 3          | 7548.723           | 0.001                                 |

**Table S4.** Observed frequencies and residuals (in MHz) for the rotational transitions of  $^{13}\text{C}_2$  monosubstituted isotopologue of conformer cc  $\alpha$   $^4\text{C}_1$  of D-xylose.

| $J'$ | $K'_{-1}$ | $K'_{+1}$ | $J''$ | $K''_{-1}$ | $K''_{+1}$ | $\nu_{\text{obs}}$ | $\nu_{\text{obs}} - \nu_{\text{cal}}$ |
|------|-----------|-----------|-------|------------|------------|--------------------|---------------------------------------|
| 3    | 2         | 2         | 2     | 2          | 1          | 6576.340           | -0.007                                |
| 3    | 2         | 1         | 2     | 2          | 0          | 7279.272           | 0.004                                 |
| 4    | 1         | 4         | 3     | 1          | 3          | 7528.123           | -0.006                                |
| 4    | 0         | 4         | 3     | 0          | 3          | 7564.501           | 0.008                                 |
| 5    | 1         | 5         | 4     | 1          | 4          | 9269.294           | 0.000                                 |

**Table S5.** Observed frequencies and residuals (in MHz) for the rotational transitions of  $^{13}\text{C}_3$  monosubstituted isotopologue of conformer cc  $\alpha$   $^4\text{C}_1$  of D-xylose.

| $J'$ | $K'_{-1}$ | $K'_{+1}$ | $J''$ | $K''_{-1}$ | $K''_{+1}$ | $\nu_{\text{obs}}$ | $\nu_{\text{obs}} - \nu_{\text{cal}}$ |
|------|-----------|-----------|-------|------------|------------|--------------------|---------------------------------------|
| 3    | 2         | 2         | 2     | 2          | 1          | 6583.535           | 0.016                                 |
| 3    | 2         | 1         | 2     | 2          | 0          | 7290.026           | -0.004                                |
| 4    | 1         | 4         | 3     | 1          | 3          | 7532.948           | -0.008                                |

|   |   |   |   |   |   |          |        |
|---|---|---|---|---|---|----------|--------|
| 4 | 0 | 4 | 3 | 0 | 3 | 7568.970 | 0.001  |
| 4 | 2 | 3 | 3 | 2 | 2 | 8580.682 | -0.007 |
| 5 | 0 | 5 | 4 | 0 | 4 | 9283.710 | 0.004  |

**Table S6.** Observed frequencies and residuals (in MHz) for the rotational transitions of  $^{13}\text{C}_4$  monosubstituted isotopologue of conformer cc  $\alpha$   $^4\text{C}_1$  of D-xylose.

| $J'$ | $K'_{-1}$ | $K'_{+1}$ | $J''$ | $K''_{-1}$ | $K''_{+1}$ | $\nu_{\text{obs}}$ | $\nu_{\text{obs}} - \nu_{\text{cal}}$ |
|------|-----------|-----------|-------|------------|------------|--------------------|---------------------------------------|
| 3    | 2         | 2         | 2     | 2          | 1          | 6560.364           | 0.000                                 |
| 3    | 1         | 2         | 2     | 1          | 1          | 7045.279           | 0.000                                 |
| 3    | 2         | 1         | 2     | 2          | 0          | 7254.231           | -0.001                                |
| 4    | 1         | 4         | 3     | 1          | 3          | 7516.360           | 0.006                                 |
| 4    | 0         | 4         | 3     | 0          | 3          | 7554.434           | -0.001                                |
| 4    | 1         | 3         | 3     | 1          | 2          | 8958.021           | -0.000                                |
| 5    | 1         | 5         | 4     | 1          | 4          | 9255.304           | -0.004                                |

**Table S7.** Observed frequencies and residuals (in MHz) for the rotational transitions of  $^{13}\text{C}_5$  monosubstituted isotopologue of conformer cc  $\alpha$   $^4\text{C}_1$  of D-xylose.

| $J'$ | $K'_{-1}$ | $K'_{+1}$ | $J''$ | $K''_{-1}$ | $K''_{+1}$ | $\nu_{\text{obs}}$ | $\nu_{\text{obs}} - \nu_{\text{cal}}$ |
|------|-----------|-----------|-------|------------|------------|--------------------|---------------------------------------|
| 3    | 2         | 2         | 2     | 2          | 1          | 6572.087           | 0.002                                 |
| 3    | 1         | 2         | 2     | 1          | 1          | 7053.066           | -0.001                                |
| 3    | 2         | 1         | 2     | 2          | 0          | 7291.549           | 0.001                                 |
| 4    | 1         | 4         | 3     | 1          | 3          | 7505.032           | -0.006                                |
| 4    | 0         | 4         | 3     | 0          | 3          | 7538.385           | 0.007                                 |
| 4    | 2         | 3         | 3     | 2          | 2          | 8559.499           | -0.001                                |
| 5    | 0         | 5         | 4     | 0          | 4          | 9247.073           | -0.000                                |

**Table S8.** Rotational parameters of the monosubstituted isotopologues of conformer cc  $\alpha$   $^4\text{C}_1$  of D-xylose.

| Parameter           | $^{13}\text{C}(1)$         | $^{13}\text{C}(2)$ | $^{13}\text{C}(3)$ | $^{13}\text{C}(4)$ | $^{13}\text{C}(5)$ |
|---------------------|----------------------------|--------------------|--------------------|--------------------|--------------------|
| A /MHz <sup>a</sup> | 1721.1371(79) <sup>d</sup> | 1719.297(41)       | 1720.169(34)       | 1722.7058(32)      | 1707.5224(76)      |
| B /MHz              | 1323.06599(84)             | 1327.8312(43)      | 1329.7876(34)      | 1323.87715(57)     | 1329.45972(78)     |
| C /MHz              | 862.26212(70)              | 864.2846(24)       | 864.7186(23)       | 862.91080(38)      | 861.23530(57)      |
| $\sigma^b$ / KHz    | 2.7                        | 5.6                | 8.3                | 2.9                | 3.6                |
| N <sup>c</sup>      | 5                          | 5                  | 6                  | 7                  | 7                  |

[a] A, B and C are the rotational constants. [b] Rms deviation of the fit. [c] Number of fitted transitions. [d] Standard error in parenthesis in the units of the last digit.

**Table S9.** Substitution coordinates of conformer  $cc \alpha^4 C_1$  of D-xylose (principal-inertial-axis coordinates in Å); *ab initio* data according to MP2/6-311++G(d,p).

| <i>Atom</i> | <i>Substitution Coordinates</i> |             |            | <i>MP2 Coordinates</i> |          |          |
|-------------|---------------------------------|-------------|------------|------------------------|----------|----------|
|             | <i>/a/</i>                      | <i>/b/</i>  | <i>/c/</i> | <i>a</i>               | <i>b</i> | <i>c</i> |
| $C_1$       | 1.46736(82)                     | 0.6191(19)  | 0.3136(38) | 1.46252                | -0.62357 | -0.32401 |
| $C_2$       | 0.7908(17)                      | 0.7312(16)  | 0.5066(24) | 0.80242                | 0.74153  | -0.50772 |
| $C_3$       | 0.5239(23)                      | 0.7695(16)  | 0.2172(55) | -0.54196               | 0.77621  | 0.20369  |
| $C_4$       | 1.39834(86)                     | 0.3733(32)  | 0.2596(46) | -1.39636               | -0.38407 | -0.26535 |
| $C_5$       | 0.6357(19)                      | 1.68354(71) | 0.014(86)  | -0.64082               | -1.68141 | -0.02147 |
